# Supplementary material for: Electrophoretic deposition of fluorescent Cu and Au sheets for light-emitting diodes
Source: Royal Society of Chemistry journal article supplement (doi:10.1039/c5nr06599b), 2015-11-30
Supplement: c5nr06599b1.pdf [file c5nr06599b1.pdf]

## Supporting Information:

### Electrophoretic Deposition of Fluorescent Cu and Au Sheets for Light-Emitting Diodes

*Jiale Liu,<sup>a</sup> Zhennan Wu,<sup>a</sup> Tingting Li,<sup>a</sup> Ding Zhou,<sup>a</sup> Kai Zhang,<sup>a</sup> Yu Sheng,<sup>\*b</sup> Jianli Cui,<sup>\*c</sup> Hao Zhang<sup>\*a</sup> and Bai Yang<sup>a</sup>*

<sup>a</sup> State Key Laboratory of Supramolecular Structure and Materials, College of Chemistry, Jilin University, Changchun 130012, P. R. China. E-mail: hao\_zhang@jlu.edu.cn.

<sup>b</sup> Department of Dermatology, First Affiliated Hospital, Harbin Medical University, Harbin 150001, P. R. China. E-mail: sf555812@163.com.

<sup>c</sup> Department of Hand & Foot Surgery, The First Hospital of Jilin University, Changchun 130021, P. R. China. E-mail: tsuijianli@126.com.

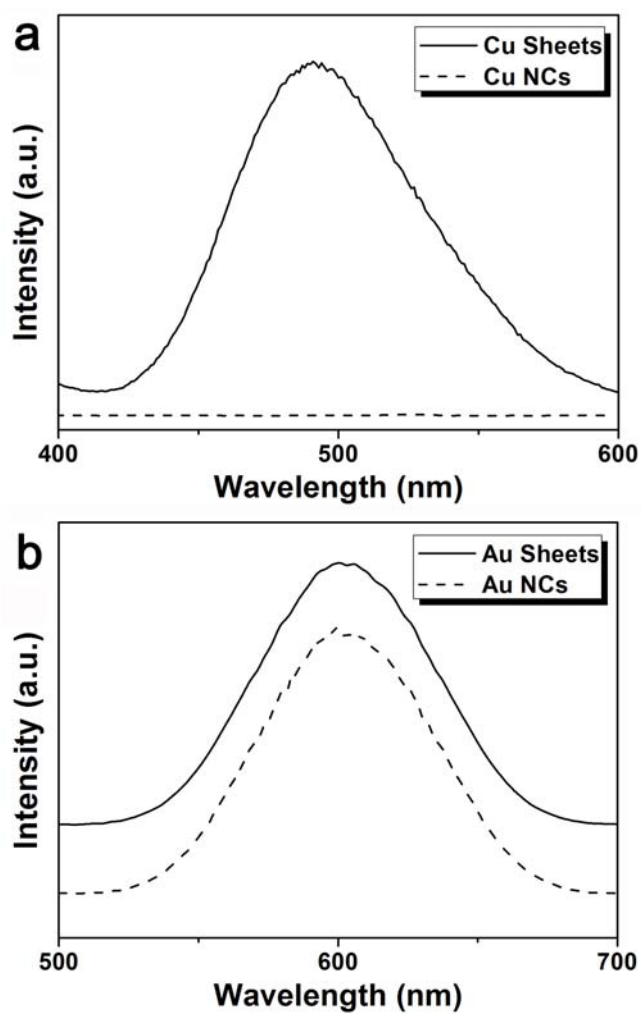

**Figure S1.** (a) PL spectra of individual Cu NCs and the as-assembled Cu sheets. (b) PL spectra of individual Au NCs and the as-assembled Au sheets.

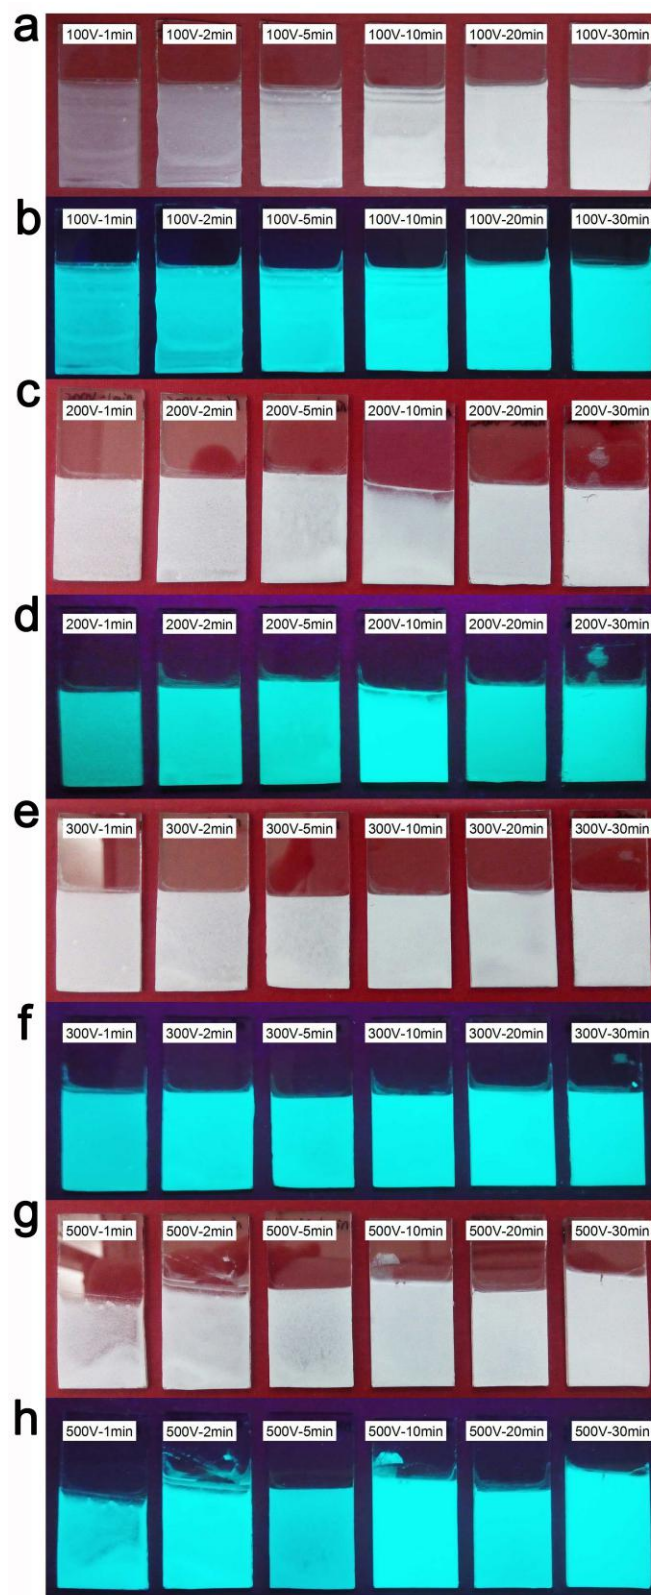

**Figure S2.** The optical (a, c, e, g) and fluorescent (b, d, f, h) images of the as-deposited Cu sheets film under 100 (a, b), 200 (c, d), 300 (e, f), and 500 (g, h) V for 1, 2, 5, 10, 20, and 30 min. The suspension for EPD is prepared by dispersing 8 mg Cu sheets in 10 mL chloroform.

| Concentration<br>Time | 2 min | 5 min | 10 min | 20 min |
|-----------------------|-------|-------|--------|--------|
| 0.2 mg/mL             | 0.4   | 0.7   | 0.8    | 0.9    |
| 0.4 mg/mL             | 1.1   | 1.3   | 1.6    | 1.9    |
| 0.8 mg/mL             | 1.7   | 3.4   | 4.7    | 5.9    |

**Table S1.** The deposited mass (mg) *versus* Cu sheets concentration and deposition duration. The EPD is operated under 200 V. The volume of the suspension is 10 mL.

| Voltage<br>Time | 1 min | 2 min | 5 min | 10 min | 20 min | 30 min |
|-----------------|-------|-------|-------|--------|--------|--------|
| 100 V           | 0.5   | 0.9   | 1.9   | 2.8    | 3.8    | 4.8    |
| 200 V           | 0.9   | 1.7   | 3.4   | 4.7    | 5.9    | 6.3    |
| 300 V           | 1.2   | 2.5   | 4.8   | 5.8    | 6.7    | 6.9    |
| 500 V           | 2.2   | 4.3   | 5.7   | 6.5    | 7.0    | 7.2    |

**Table S2.** The deposited mass (mg) *versus* the voltage and deposition duration. The Cu sheets concentration is 0.8 mg/mL. The volume of the suspension is 10 mL.

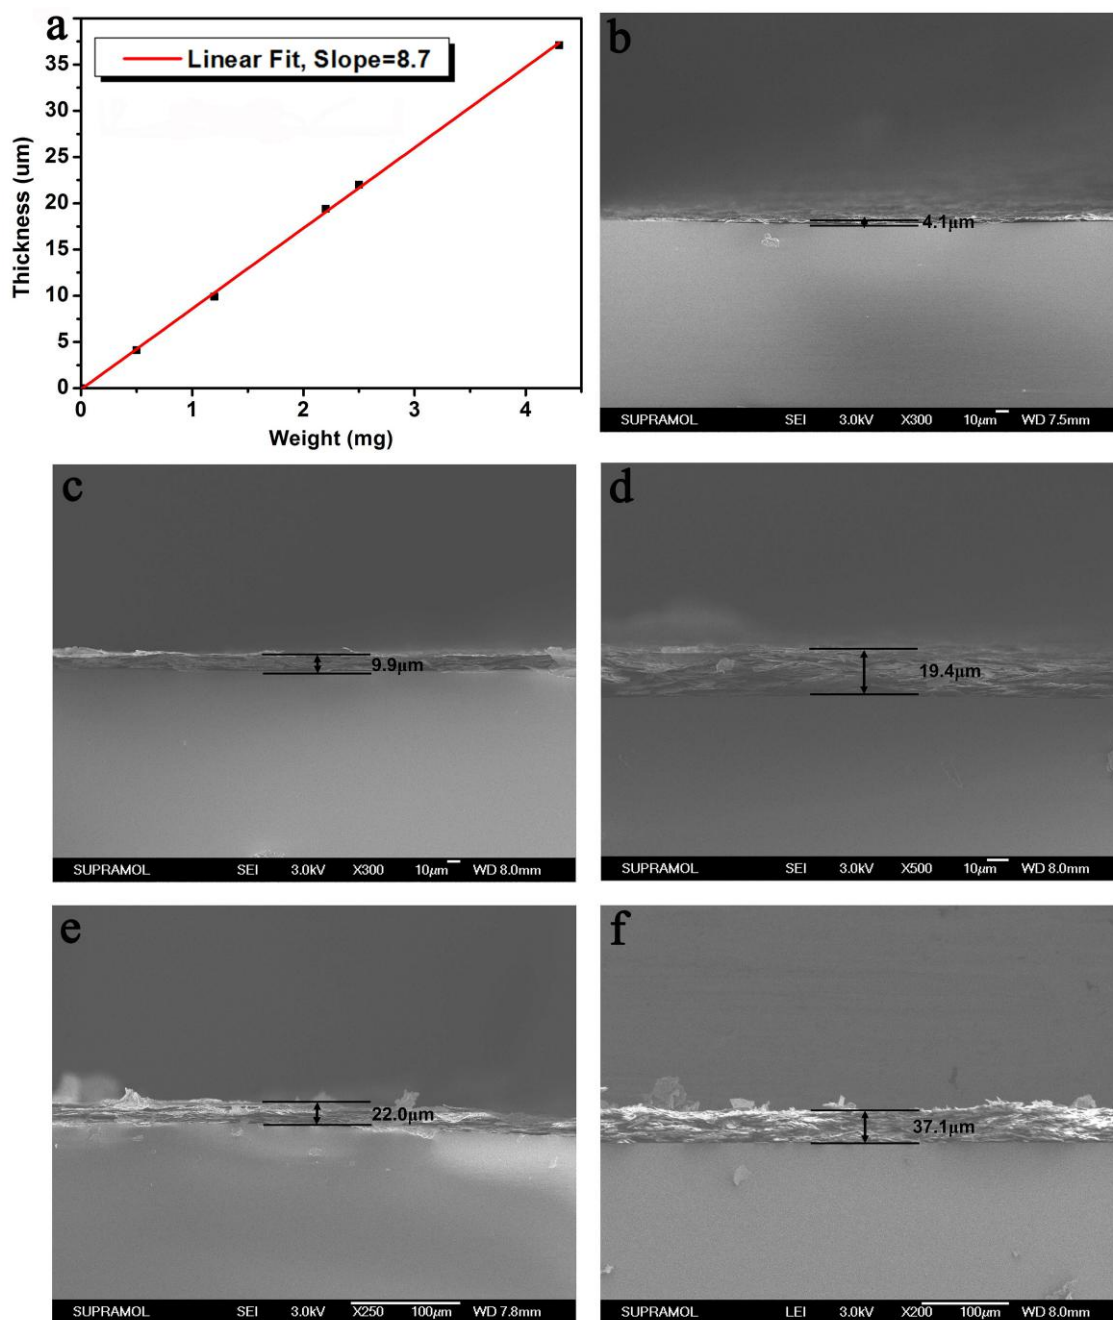

**Figure S3.** (a) The film thickness *versus* the deposited mass of Cu sheets. (b-f) Cross sectional SEM images of the as-deposited Cu sheets film under 100 V for 1 min (b), 300 V for 1 min (c), 500 V for 1 min (d), 300 V for 2 min (e), and 500 V for 2 min (f). The suspension for EPD is prepared by dispersing 8 mg Cu sheets in 10 mL chloroform.
